# Supplementary material for: Extended seasonal prediction of Antarctic sea ice using ANTSIC-UNet
Source: Copernicus journal article supplement (doi:10.5194/egusphere-2024-1001), 2024-06-03
Supplement: Supplementary file 1 [file egusphere-2024-1001-supplement.pdf]

# Supplementary Material

Ziying Yang<sup>1,2</sup>, Jiping Liu<sup>3</sup>, Mirong Song<sup>1</sup>, Yongyun Hu<sup>4</sup>, Qinghua Yang<sup>3</sup>, Ke Fan<sup>3</sup>

<sup>1</sup>Institute of Atmospheric Physics, Chinese Academy of Sciences, Beijing 100029, China

<sup>2</sup>University of Chinese Academy of Sciences, Beijing 101408, China

<sup>3</sup>School of Atmospheric Sciences, Sun Yat-sen University, and Southern Marine Science and Engineering Guangdong Laboratory (Zhuhai), Zhuhai 519082, China

<sup>4</sup>Department of Atmospheric and Oceanic Sciences, School of Physics, Peking University, Beijing 100087, China

*Correspondence to:* Jiping Liu (liujp63@mail.sysu.edu.cn)

## Contents of this file

**Figure S1 to S4**

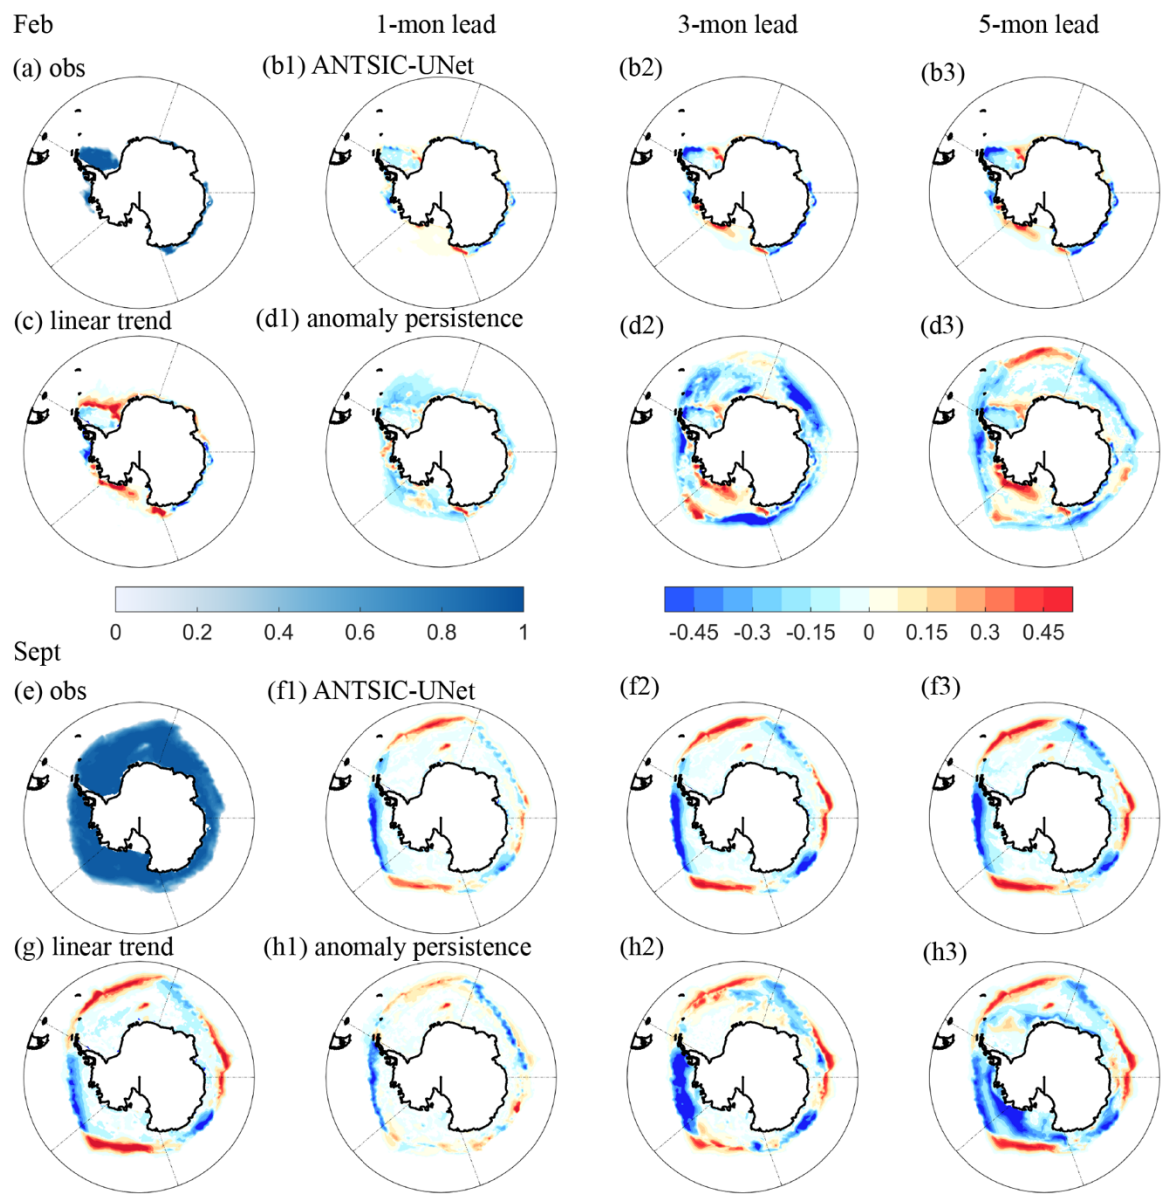

**Figure S1. The monthly mean sea ice concentration of the NSIDC observations for (a) February and (e) September, and the errors predicted by ANTSIC-UNet (b1-b3, f1-f3), the linear trend model (c and g), and anomaly persistence model (d1-d3, h1-h3) at lead time of 1, 3, and 5 months for February (upper panel) and September (lower panel) for 2017.**

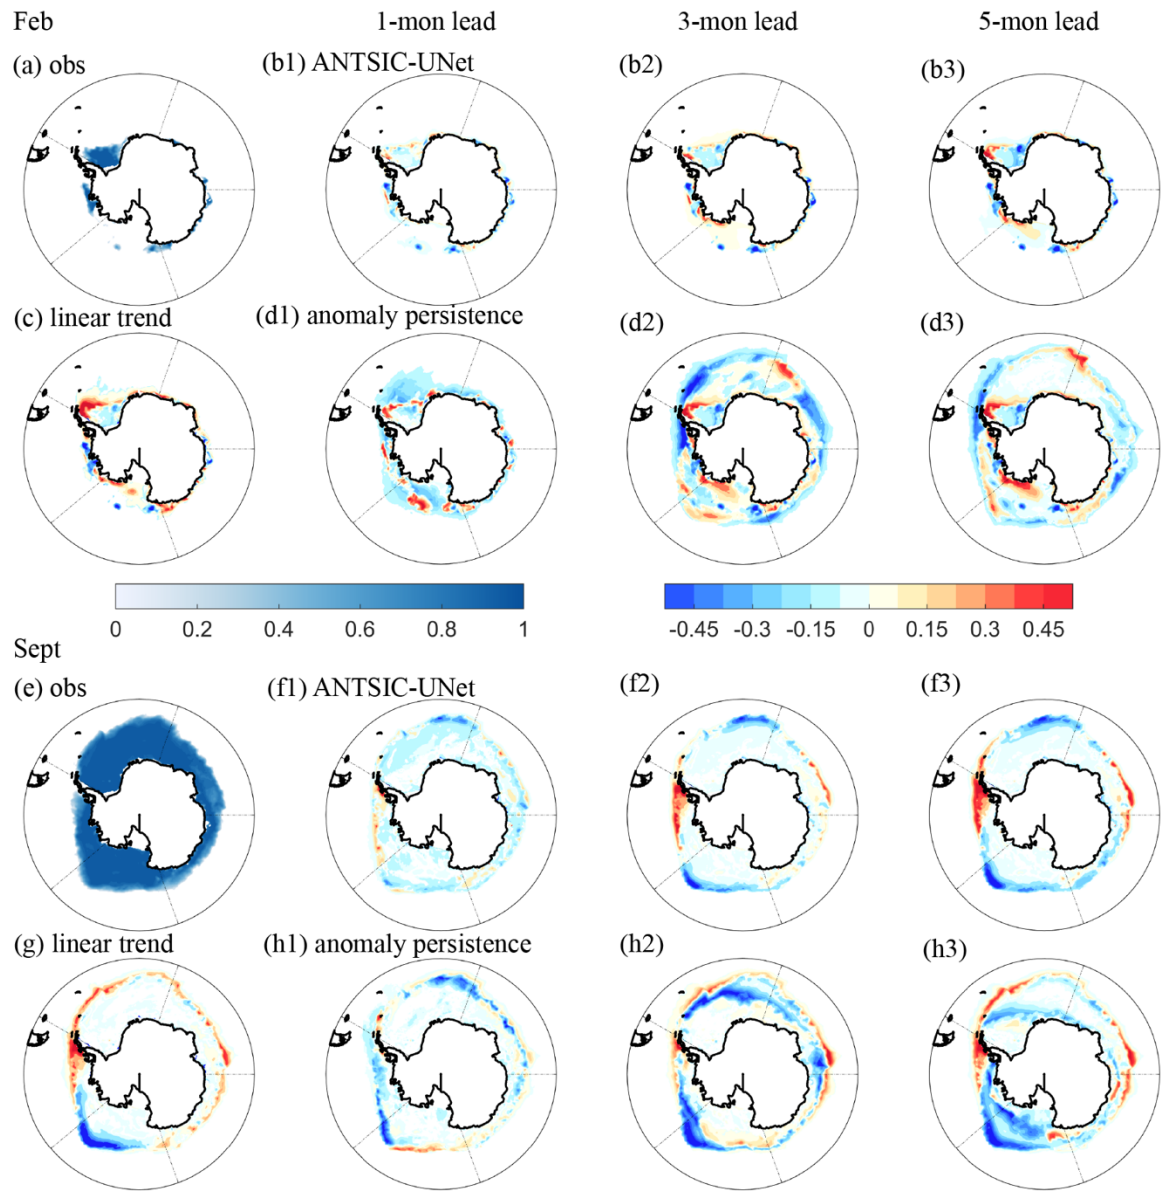

Figure S2. Same as figure S1 but for 2022.

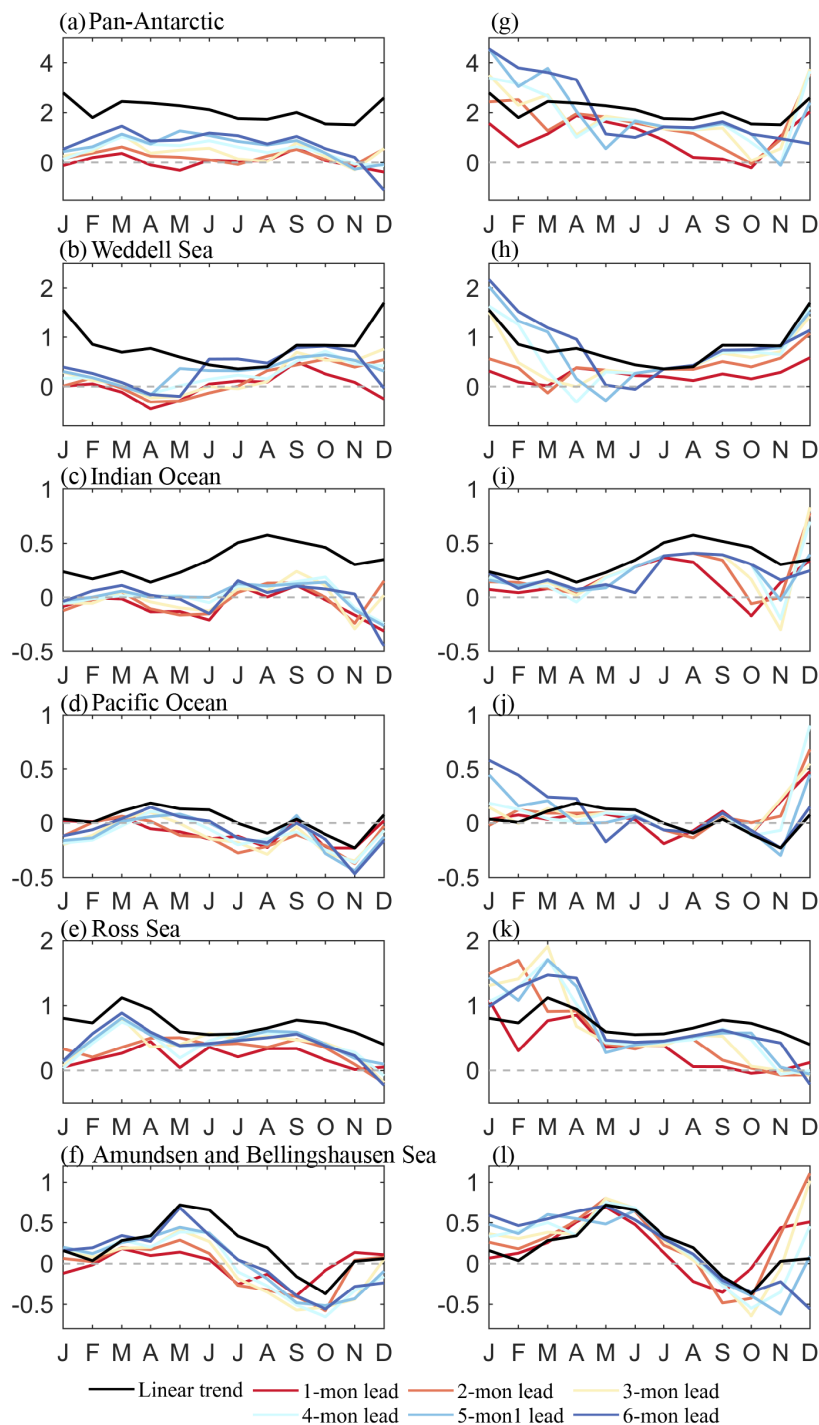

**Figure S3. Seasonality errors of the Pan- and regional Antarctic monthly mean SIE (SIC > 15%) between NSIDC observations and ANTSIC-UNet (a-f) and anomaly persistence model (g-l) predictions at different lead times for 2017. The black lines show the seasonality SIE errors between observations and linear trend model. (units: million square kilometers)**

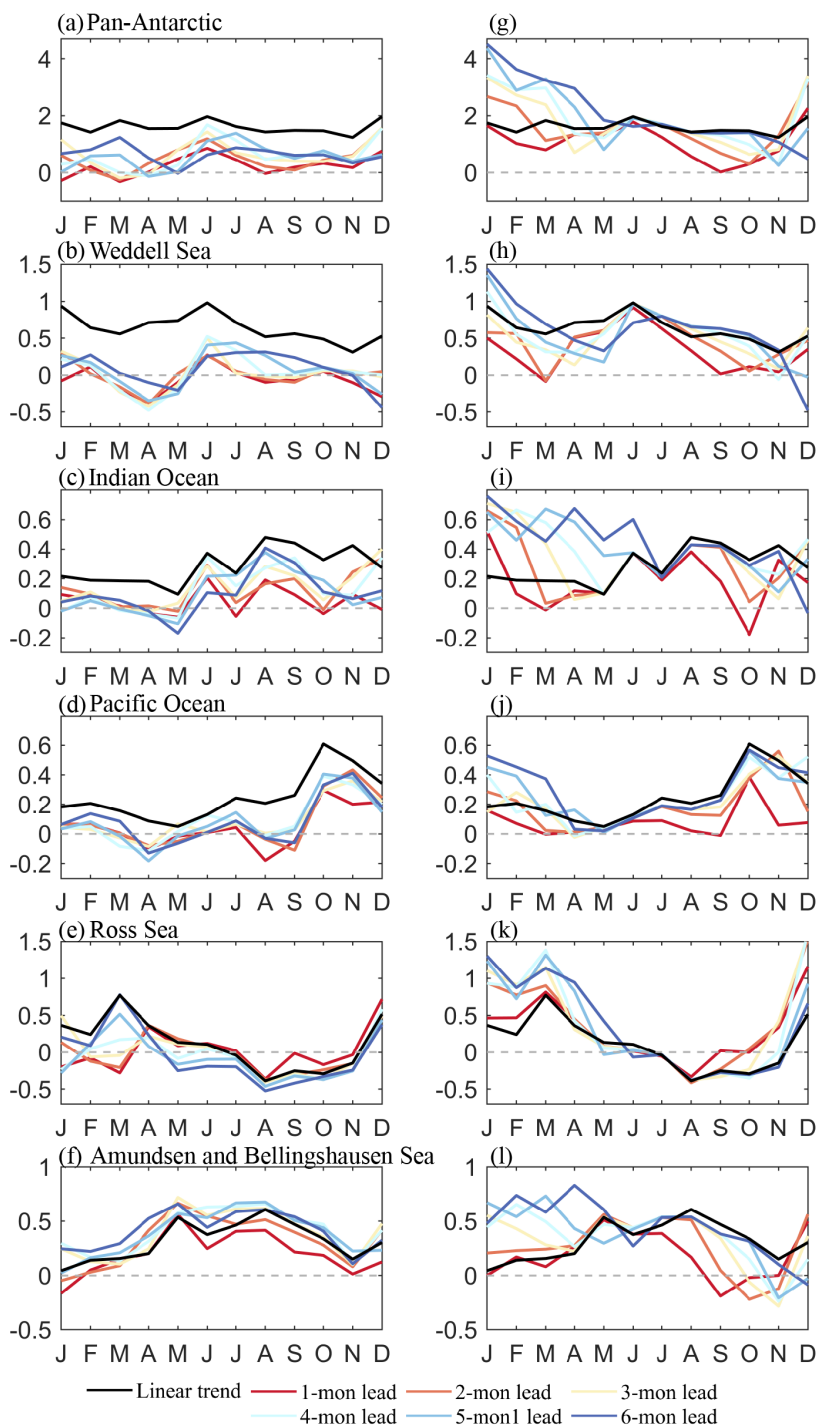

Figure S4. Same as figure S3 but for 2022.
